# Supplementary material
Source: ML conference proceedings conference paper supplement (https://openaccess.thecvf.com/content/WACV_2020/html/Mani_MonoLayout_Amodal_scene_WACV_2020_paper.html)
Supplement: Supplementary file 1 [file Mani_MonoLayout_Amodal_scene_WACV_2020_supplemental.pdf]

Archive with 3 entries (2 files):
- 1053-supp/
- 1053-supp/1053-supp.mp4
- 1053-supp/1053-supp.pdf
