# Supplementary material
Source: ML conference proceedings conference paper supplement (https://openaccess.thecvf.com/content/WACV_2020/html/Mani_MonoLayout_Amodal_scene_WACV_2020_paper.html)
Supplement: Supplementary file 1 [file Mani_MonoLayout_Amodal_scene_WACV_2020_supplemental.pdf › 1053-supp/1053-supp.pdf]

# Supplemental Material:

## *MonoLayout*: Amodal scene layout from a single image

Kaustubh Mani \* <sup>1</sup>, Swapnil Daga<sup>1</sup>, Shubhika Garg<sup>2</sup>, N. Sai Shankar<sup>1</sup>, J. Krishna Murthy<sup>3,4</sup>, and K. Madhava Krishna<sup>1</sup>

<sup>1</sup>Robotics Research Center, KCIS, IIT Hyderabad, India, <sup>2</sup>IIT Kharagpur, <sup>3</sup>Mila - Quebec AI Institute, Montreal, Canada, <sup>4</sup>Université de Montréal

### Abstract

*In this article, we present a few additional details and results to supplement the claims and findings of the main paper. Specifically, we discuss the network architecture in greater detail and provide training specifics. We also evaluate against additional approaches (that are somewhat tangentially relevant to MonoLayout). We also demonstrate two use-cases of MonoLayout, in trajectory forecasting and multi-object tracking respectively. Additional qualitative results are included towards the end of the article.*

*More importantly, we also present a few failure cases and negative results (a glossary of experiments that did not work out), in the spirit of fostering reproducibility and expediting progress in this nascent field.*

*Please watch the enclosed video attachment for demonstrations, to get a closer idea of how MonoLayout performs in practice.*

## 1. Implementation Details

In this section, we describe the network architecture and training procedure in greater detail.

### 1.1. Network Architecture

*MonoLayout* comprises the following four blocks: a feature extractor, a static layout decoder, dynamic layout decoder, and two discriminators.

#### Feature extractor

Our feature extractor is built on top of a ResNet-18 encoder<sup>1</sup>. The network usually takes in RGB images of size  $3 \times 512 \times 512$  as input, and produces a

$512 \times 32 \times 32$  feature map as output. In particular, we use the ResNet-18 architecture without bottleneck layers. (Bottleneck layers are absent, to ensure fair comparison with OFT [15]). This extracted feature map is what we refer to as the *shared context*.

#### Layout Decoders

We use two parallel decoders with identical architectures to estimate the static and dynamic layouts. The decoders consists 2 convolution layers and take as input the  $512 \times 32 \times 32$  shared context. The first convolution block maps this shared context to a  $128 \times 16 \times 16$  feature map, and the second convolution block maps the output of the first block to another  $128 \times 8 \times 8$  feature map.

At this point, 4 deconvolution (transposed convolution) blocks are applied on top of this feature map. Each block increases spatial resolution by a factor of 2, and decreases the number of channels to 64, 32, 16, and  $O$  respectively, where  $O$  is the number of channels in the output feature map ( $O \in \{1, 2\}$  for the static layout decoder, and  $O = 1$  for the dynamic layout decoder). This results in an output feature map of size  $O \times 128 \times 128$ . We also apply a spatial dropout (ratio of 0.4) to the penultimate layer, to impose stochastic regularization. The output  $128 \times 128$  grid corresponds to a rectangular region of area  $40m \times 40m$  on the ground plane.

#### Discriminators

The discriminator architecture is inspired by Pix2Pix [8]. We found the patch based regularization in Pix2Pix to be much better than a standard DC-GAN [14]. So, we use patch-level discriminators that contain four convolution layers (kernel size  $3 \times 3$ ,

in practice.

\*Corresponding author: kaustubh3095@gmail.com  
Project page: <https://hbutsuak95.github.io/monolayout/>

<sup>1</sup>We also tried other feature extraction / image-image architectures such as UNet and ENet, but found them to be far inferior

stride 2), that outputs an  $8 \times 8$  feature map. This feature map is passed through a *tanh* nonlinearity and used for patch discrimination.

### 1.2. Training details

We train *MonoLayout* with a batch size of 16 for 200 epochs using the Adam [9] optimizer with initial learning rate  $5e - 5$ . The input image is reshaped to  $3 \times 512 \times 512$  and further augmented to make our model more robust. Some of the augmentation techniques we use include random horizontal flipping and color jittering.

### 1.3. Metrics used

#### Road layout estimation

To evaluate estimated road layouts, we use intersection-over-union (IoU) as our primary metric. We split IoU evaluation into two parts and measure IoU for the entire static scene, as well as IoU for occluded regions (i.e., regions of the road that are occluded in the image and were hallucinated by *MonoLayout*).

#### Vehicle occupancy estimation

While most approaches to vehicle detection evaluate only mean Average Precision (mAP), it has been shown to be a grossly inaccurate measure of how tight a bounding box is [7]. We hence adopt mean Intersection-over-Union (mIoU) as our primary basis of evaluation. To ensure a fair comparison with prior art, we also report mAP.<sup>2</sup> (Note that, since we are evaluating object detection in bird’s eye view, and not in 3D, we use the mIoU and mAP, as is common practice [4, 5]). This choice of metrics is based on the fact that *MonoLayout* is not an object “detection” approach; it is rather an object occupancy estimation approach, which calls for mIoU and mAP evaluation. We extend the other object “detection” approaches (such as pseudo-lidar based approaches [15, 18, 20]) to the occupancy estimation setting, for a fair comparison.

## 2. Timing analysis

We also show the computation test time of our method as compared to similar methods in Table 2. Our network does not require discriminator to be used during inference time. It achieves real time inference rate of approx. 30 Hz for an input image with a resolution of  $512 * 512$  pixels and an output map with  $128 * 128$  occupancy grid cells using a Nvidia GeForce GTX 1080Ti GPU. The code for [17] is not publicly available,

<sup>2</sup>We outperform existing methods under both these metrics

and the computation time is based on the PSMNet [2] backbone they use. Here again the proposed method is almost an order faster than previous methods making it more attractive for on-road implementations.

## 3. Comparison with pseudo-lidar

There is another recent set of approaches to object detection in bird’s eye view—*pseudo-lidar* approaches [19]. At the core of these approaches lies the idea that, since lidar object detection works exceedingly well, monocular images can be mapped to (*pseudo*) lidar-like maps in bird’s eye view, and object detection networks tailored to lidar bird’s eye view maps can readily be applied to this setting. Such approaches are primarily geared towards detecting objects in lidar-like maps.

*MonoLayout*, on the other hand, intends to estimate an *amodal* scene layout, and to do so, it must reason not only about vehicles, but also about the static scene layout. Table 1 compares *MonoLayout* with a set of *pseudo-lidar* approaches, in terms of vehicle occupancy estimation and road layout estimation. Specifically, we evaluate the following pseudo-lidar based methods.

1. *ENet + Pseudo-lidar input (Monodepth2)*: Uses an ENet [13]-style encoder-decoder architecture that uses Monodepth2 [6] to get monocular depth estimates.
2. *PointRCNN + Pseudo-lidar input (Monodepth2)*: Uses a PointRCNN [18] architecture (a two-stage object detector comprising a region proposal network, and a classification network) to detect vehicles in bird’s eye view.
3. *AVOD + Pseudo-lidar input (PSMNet)*: A **stereo, supervised** method. Uses the aggregated view object detector AVOD [10] and pseudo-lidar input computed from a disparity estimation network (PSMNet [2]).

The comparison is shown in Table 1. The PointRCNN [18] and AVOD [10] are tailored specifically for object detection, and hence *cannot be repurposed to estimate road layouts*. However, the ENet [13] architecture can, and we trained it for the task of road layout estimation. We observe that, among all approaches, *MonoLayout* is the fastest (about an order of magnitude speedup over pseudo-lidar methods). Furthermore, the accuracy is competitive, if not greater, compared to pseudo-lidar based approaches.

We also evaluate against a stereo pseudo-lidar baseline (AVOD + pseudolidar PSMNet [2]). By virtue of using stereo images, and being supervised on the

| Method                                              | Vehicle (mAP) | Vehicle (mIoU) | Road (mIoU) | Frame Rate    |
|-----------------------------------------------------|---------------|----------------|-------------|---------------|
| ENet + Pseudo lidar input(Monodepth2)               | 0.37          | 0.24           | 0.62        | 12.34 fps     |
| PointRCNN + Pseudo lidar input(Monodepth2)          | <b>0.43</b>   | 0.26           | -           | 5.76 fps      |
| <i>MonoLayout</i> (Ours)                            | 0.41          | <b>0.26</b>    | <b>0.80</b> | <b>32</b> fps |
| AVOD + Pseudo lidar input(PSMNet) ( <b>Stereo</b> ) | 0.59          | 0.43           | -           | < 1.85 fps    |

Table 1: **Comparison with Pseudo-lidar [19]:** We also evaluate *MonoLayout* against several variants of pseudo-lidar [19] approaches. While the usage of increasingly heavy processing blocks for pseudo-lidar variants improves accuracy, it drastically increases computation time. On the other hand, *MonoLayout* offers—by far—the best mix of accuracy and runtime for real-time applications. Also note that the comparison with AVOD + Pseudo-lidar (PSMNet) is unfair, since it uses stereo disparities.

| Method                   | Parameters | Computation Time |
|--------------------------|------------|------------------|
| OFT [15]                 | 24.5 M     | 2 fps            |
| MonoOccupancy [11]       | 27.5 M     | 15 fps           |
| Schulter et al. [17]     | >> 20 M    | < 3 fps          |
| <i>MonoLayout</i> (Ours) | 19.6M      | 32 fps           |

Table 2: A comparative study of test computation time on NVIDIA GeForce GTX 1080Ti GPU for different methods on the images of KITTI [5] RAW dataset.

KITTI Object dataset <sup>3</sup>, achieves superior performance. However, the comparison is unfair, and is provided only for a reference, to enable progress in amodal layout estimation from a monocular camera.

Another shortcoming of pseudolidar-style approaches is that, it is not possible to learn *visual* (i.e., image intensity based) features that are extremely useful in road layout estimation).

#### 4. Application: Trajectory forecasting

One of the use-cases of *MonoLayout* is to forecast future trajectories from the estimated *amodal* scene layout.

We demonstrate accurate trajectory forecasting performance by training a Convolutional LSTM that operates over the estimated layouts from *MonoLayout*. Specifically, we adopt an encoder-decoder structure similar to ENet [13], but add a convolutional LSTM between the encoder and the decoder. We also add a convolutional LSTM over each of the skip connections present in ENet.

We *pre-condition* the trajectory forecasting network for 1 second, by feeding it images, and then predict future trajectories for the next 3 seconds. Note that, when predicting future trajectories, no images are fed to the forecasting network. Rather, the network oper-

ates in an autoregressive manner, by producing an output trajectory estimate, and using this estimate as the subsequent input. *We also tried predicting static scene layouts, to forecast future static scenes, but without any success, owing to the high variability in static scene layouts.* The resultant model, called *MonoLayout-forecast*, works in real-time, and accurately forecasts the future trajectory of a moving vehicle, as shown in Fig. 1. As with the layout estimation task, the forecast trajectories are confined to a  $128 \times 128$  grid, equivalent to a  $40m \times 40m$  square area in front of the ego-vehicle.

#### 5. Application: Multi-object tracking

Further, we propose an extension to generate accurate *tracks* of multiple moving vehicles by leveraging the vehicle occupancy estimation capabilities of *MonoLayout*. We also construct a strong baseline multi-object tracker using the open-source implementation from IoU-Tracker [1] as a reference. We term this baseline *BEVTracker*. Specifically, we use disparity estimates from stereo cameras, semantic and instance segmentation labels, to segment and identify unique cars in bird’s eye view. We then run IoU-Tracker [1] on these estimates.

We demonstrate in Table 3 that *MonoLayout* outperforms BEVTracker [1], without access to any such specialized information (disparity, semantics, instances). Instead, we run a traditional OpenCV blob detector on *MonoLayout* vehicle occupancy estimates, and use the estimated instances to obtain the coordinates of the center of the vehicle. We then use a *maximum-overlap* data association strategy across time, using intersection-over-union to measure overlap. We run our approach on all 24 sequences of the KITTI Tracking (train) benchmark, and present the results in Table 3.

<sup>3</sup>Monodepth2 [6] is unsupervised, and has not been finetuned on the KITTI Object dataset

| Method                                                              | Mean Error in Z (m) | Mean Error in X (m) | Mean L2 error (m) |
|---------------------------------------------------------------------|---------------------|---------------------|-------------------|
| BEVTracker (Open-source [1], enhanced with stereo, semantics, etc.) | 1.08                | 0.51                | 1.27              |
| <i>MonoLayout</i> (Ours)                                            | <b>0.23</b>         | <b>0.47</b>         | <b>0.58</b>       |

Table 3: **Multi-object tracking performance:** We show the performance of *MonoLayout* on a multi-object tracking task, in bird’s eye view. The comparison is unfair as *BEVTracker* uses strictly more information (disparities, semantic segmentation, instance segmentation). However, *MonoLayout* does not employ any such privileged information, and as such uses OpenCV blob detection to identify instances, and a *maximum-IoU-overlap* data association framework. These estimates are obtained over 24 sequences of the KITTI tracking benchmark. (Caveat: We only evaluate tracking accuracies for cars within a  $40m \times 40m$  square region around the ego-vehicle, as *MonoLayout* estimates are confined to this region).

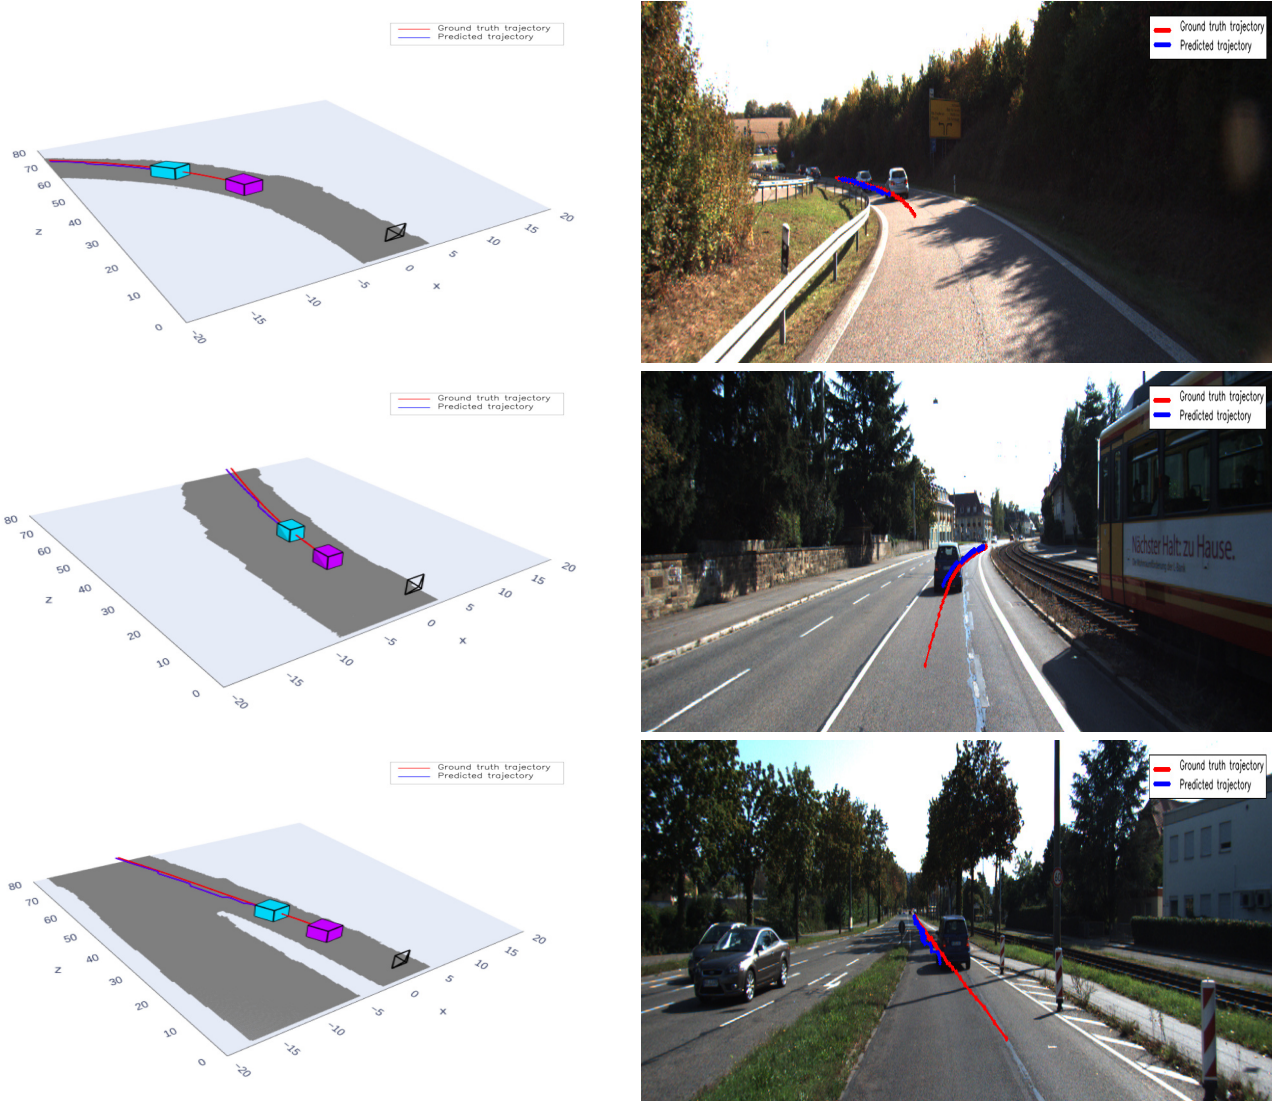

Figure 1: **Trajectory forecasting:** *MonoLayout-forecast* accurately estimates future trajectories of moving vehicles. (Left): In each figure, the magenta cuboid shows the initial position of the vehicle. *MonoLayout-forecast* is pre-conditioned for 1 seconds, by observing the vehicle, at which point (cyan cuboid) it starts forecasting future trajectories (shown in blue). The ground-truth trajectory is shown in red, for comparison. (Right): Trajectories visualized in image space. Notice how *MonoLayout-forecast* is able to forecast trajectories accurately despite the presence of moving obstacles (top row), turns (middle row), and merging traffic (bottom row).

## 6. More qualitative results

Additional qualitative results of joint static and dynamic scene layout estimation are presented in Fig. 2 and Fig. 3.

## 7. Shortcomings

Despite outperforming several state-of-the-art approaches and achieving real-time performance, *MonoLayout* also suffers a few shortcomings. In this section, we discuss some failure cases of *MonoLayout* and also some negative results. Please watch the supplementary video for additional results.

### 7.1. Failure cases

Fig. 4 shows a few scenarios in which *MonoLayout* fails to produce accurate layout estimates. Recall that *MonoLayout* uses adversarial feature learning to estimate plausible road layouts. We leverage OpenStreetMap [12] to randomly extract road patches to use as the true data distribution. However, no such data is available for *sidewalks*, and this results in a few artifacts.

As shown in the bottom row of Fig. 4, high-dynamic range and shadows coerce the network into predicting *protrusions* along these directions. Also, as shown in the top row, sometimes, sidewalk predictions are not coherent with road predictions. In the bottom row, we show failure cases for vehicle occupancy estimation.

### 7.2. Negative results

Produced below is a list of experiments that the authors tried, but were unsuccessful. We hope this will expedite progress in this nascent field, by saving fellow researchers significant amounts of time.

#### These did not work!

- Using a single encoder-decoder network to estimate both static and dynamic scene layouts.
- Using an ENet [13] or a UNet [16] architecture as opposed to the ResNet-18 encoder and customized decoder we employed.
- Using a DCGAN [14] as opposed to patch-discriminators [8].
- Employing a variational autoencoder-style latent code between the encoder and decoder (to allow for sampling)

## References

- [1] E. Bochinski, V. Eiselein, and T. Sikora. High-speed tracking-by-detection without using image information. In *International Workshop on Traffic and Street Surveillance for Safety and Security at IEEE AVSS 2017*, 2017.
- [2] J.-R. Chang and Y.-S. Chen. Pyramid stereo matching network. In *CVPR*, 2018.
- [3] M.-F. Chang, J. Lambert, P. Sangkloy, J. Singh, S. Bak, A. Hartnett, D. Wang, P. Carr, S. Lucey, D. Ramanan, et al. Argoverse: 3d tracking and forecasting with rich maps. In *CVPR*, 2019.
- [4] X. Chen, K. Kundu, Z. Zhang, H. Ma, S. Fidler, and R. Urtasun. Monocular 3d object detection for autonomous driving. In *CVPR*, 2016.
- [5] A. Geiger, P. Lenz, and R. Urtasun. Are we ready for autonomous driving? the kitti vision benchmark suite. In *CVPR*, 2012.
- [6] C. Godard, O. Mac Aodha, M. Firman, and G. Brostow. Digging into self-supervised monocular depth estimation. *arXiv preprint*, 2018.
- [7] D. Hall, F. Dayoub, J. Skinner, H. Zhang, D. Miller, P. Corke, G. Carneiro, A. Angelova, and N. Sünderhauf. Probabilistic object detection: Definition and evaluation. *arXiv preprint arXiv:1811.10800*, 2018.
- [8] P. Isola, J.-Y. Zhu, T. Zhou, and A. A. Efros. Image-to-image translation with conditional adversarial networks. In *CVPR*, 2017.
- [9] D. P. Kingma and J. Ba. Adam: A method for stochastic optimization. In *International Conference on Learning Representations (ICLR)*, 2015.
- [10] J. Ku, M. Mozifian, J. Lee, A. Harakeh, and S. L. Waslander. Joint 3d proposal generation and object detection from view aggregation. In *IROS*, 2018.
- [11] C. Lu, M. J. G. van de Molengraft, and G. Dubbelman. Monocular semantic occupancy grid mapping with convolutional variational encoder-decoder networks. *IEEE Robotics and Automation Letters*, 2019.
- [12] OpenStreetMap contributors. Planet dump retrieved from <https://planet.osm.org>. <https://www.openstreetmap.org>, 2017.
- [13] A. Paszke, A. Chaurasia, S. Kim, and E. Culurciello. Enet: A deep neural network architecture for real-time semantic segmentation. *arXiv preprint arXiv:1606.02147*, 2016.
- [14] A. Radford, L. Metz, and S. Chintala. Unsupervised representation learning with deep convolutional generative adversarial networks. *arXiv preprint arXiv:1511.06434*, 2015.
- [15] T. Roddick, A. Kendall, and R. Cipolla. Orthographic feature transform for monocular 3d object detection. *arXiv preprint*, 2018.
- [16] O. Ronneberger, P. Fischer, and T. Brox. U-net: Convolutional networks for biomedical image segmentation. In *International Conference on Medical image computing and computer-assisted intervention*, 2015.
- [17] S. Schuster, M. Zhai, N. Jacobs, and M. Chandraker. Learning to look around objects for top-view representations of outdoor scenes. In *ECCV*, 2018.
- [18] S. Shi, X. Wang, and H. Li. Pointcrnn: 3d object proposal generation and detection from point cloud. In *CVPR*, 2019.

| <i>RGB</i>                                                                          | <i>Lu et al.</i> [11]                                                               | <i>Mono3D</i> [4]                                                                   | <i>OFT</i> [15]                                                                     | <i>MonoLayout</i>                                                                     | <i>Ground Truth</i>                                                                   |
|-------------------------------------------------------------------------------------|-------------------------------------------------------------------------------------|-------------------------------------------------------------------------------------|-------------------------------------------------------------------------------------|---------------------------------------------------------------------------------------|---------------------------------------------------------------------------------------|
| 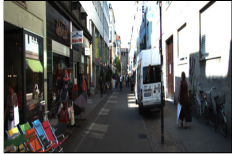   | 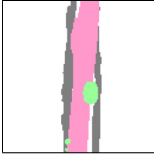   | 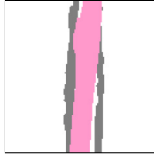   | 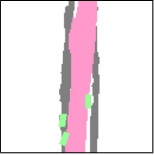   | 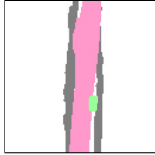   | 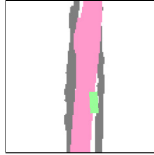   |
| 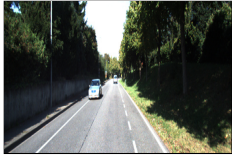   | 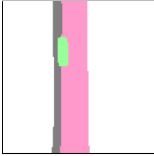   | 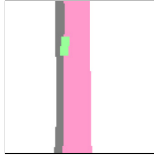   | 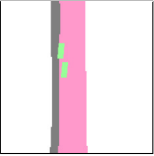   | 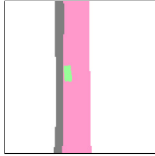   | 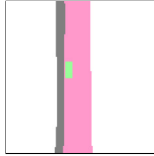   |
| 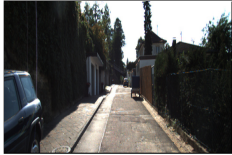   | 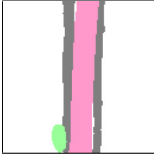   | 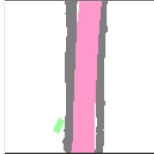   | 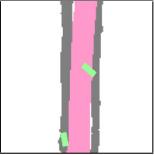   | 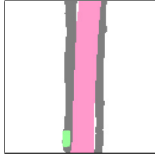   | 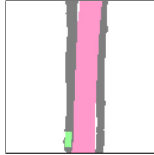   |
| 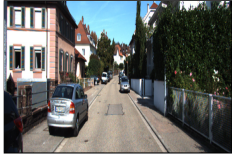   | 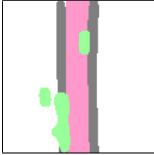   | 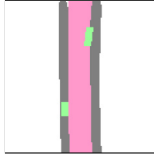   | 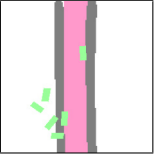   | 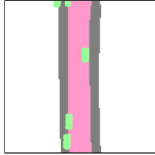   | 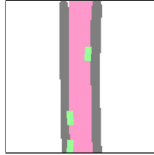   |
| 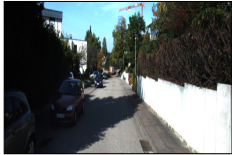  | 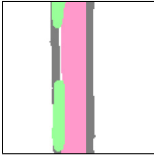  | 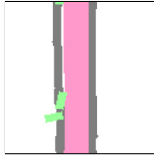  | 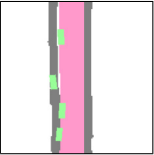  | 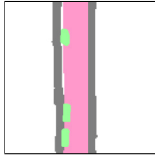  | 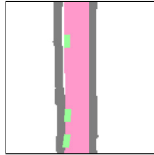  |
| 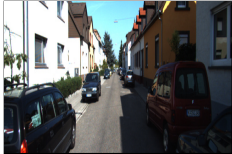 | 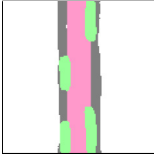 | 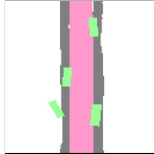 | 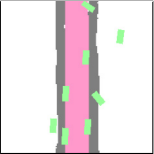 | 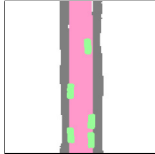 | 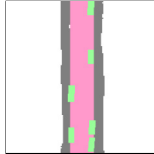 |

Figure 2: **Dynamic layout estimation on KITTI [5]**: Additional qualitative results for dynamic scene layout estimation on the KITTI [5] dataset. From left to right, the column corresponds to the input image, MonoOccupancy [11], Mono3D [4], OFT [15], *MonoLayout* (Ours), and ground-truth respectively. *MonoLayout* (Ours) produces crisp object boundaries while respecting vehicle and road geometries.

- [19] Y. Wang, W.-L. Chao, D. Garg, B. Hariharan, M. Campbell, and K. Q. Weinberger. Pseudo-lidar from visual depth estimation: Bridging the gap in 3d object detection for autonomous driving. In *CVPR*, 2019.
- [20] Y. You, Y. Wang, W.-L. Chao, D. Garg, G. Pleiss, B. Hariharan, M. Campbell, and K. Q. Weinberger. Pseudo-lidar++: Accurate depth for 3d object detection in autonomous driving. *arXiv preprint*, 2019.

|          | RGB                                                                                 | <i>MonoLayout</i>                                                                   | Ground-truth                                                                          |
|----------|-------------------------------------------------------------------------------------|-------------------------------------------------------------------------------------|---------------------------------------------------------------------------------------|
| Night    | 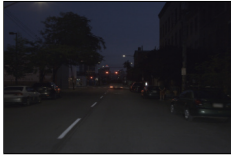   | 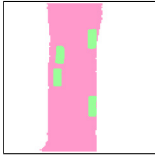   | 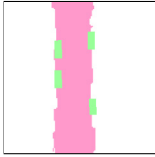   |
|          | 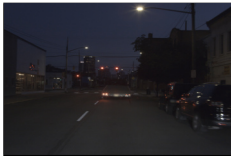   | 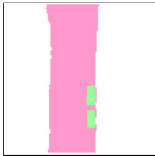   | 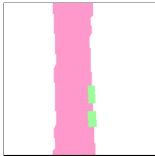   |
| Sunny    | 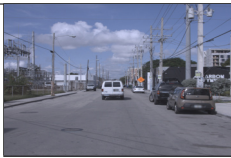   | 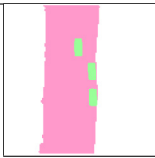   | 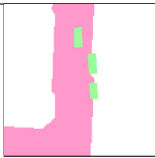   |
|          | 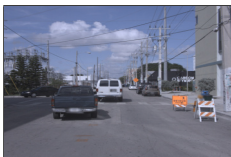  | 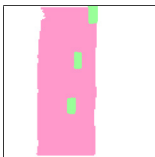  | 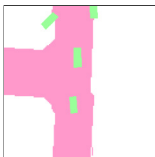  |
| Cloudy   | 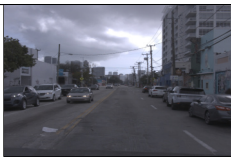 | 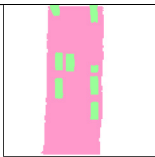 | 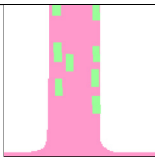 |
|          | 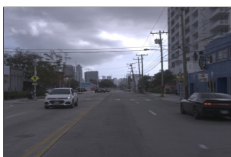 | 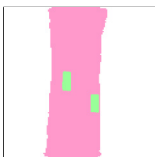 | 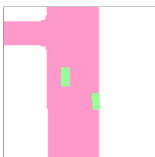 |
| Overcast | 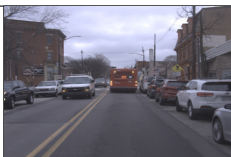 | 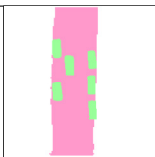 | 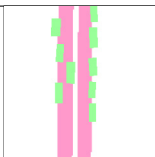 |
|          | 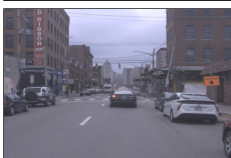 | 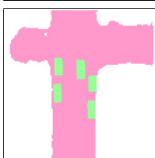 | 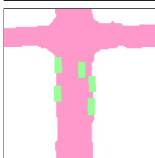 |

Figure 3: **Qualitative results on Argoverse:** Additional qualitative results on the Argoverse [3] dataset (road shown in pink, vehicles shown in green). *MonoLayout* (center column) uses both static and dynamic layout discriminators and produces sharp estimates, and is robust to varying weather conditions, high dynamic range (HDR), and shadows.

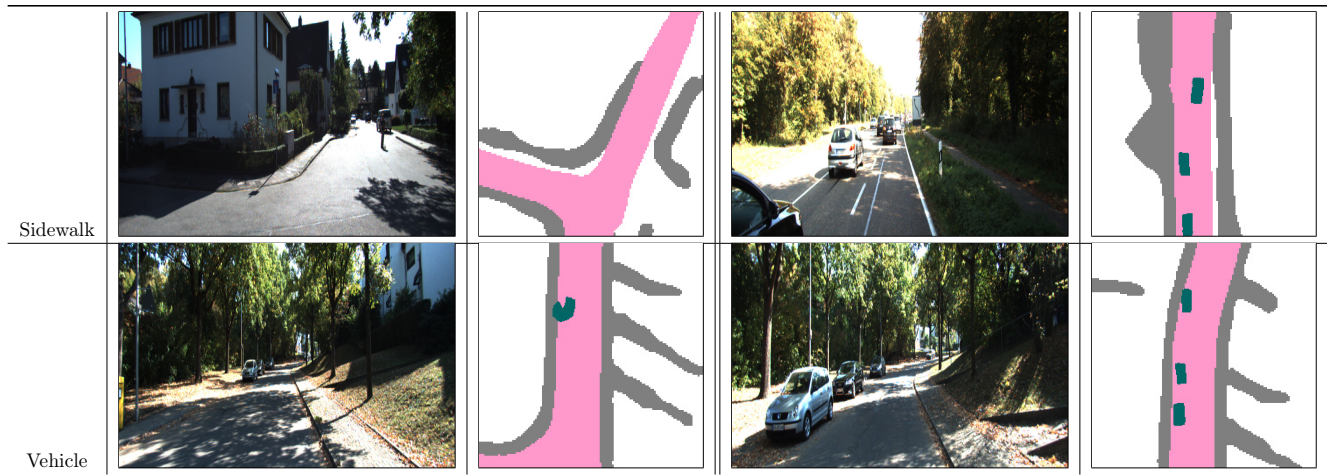

Figure 4: **Failure cases:** This figure highlights a few cases in which *MonoLayout* produces incorrect layout estimates. Adverse lighting conditions and sharp turns, in some cases effect sidewalk estimation accuracy(Row 1). Also, multiple near-by vehicles in an image get merged into a single estimate, at times. (As shown in Row 2, only when the ego-vehicle gets close to the two cars parked in close vicinity to each other, the model is able to distinguish the two cars.)
